# Supplementary material for: Calculation of Seven Photovoltaic Cells Parameters Using Parallelized Successive Discretization Algorithm
Source: Hindawi journal article supplement (doi:10.1155/2020/6669579), 2020-12-10
Supplement: f1 [file 6669579.f1.docx]

Table 6. (I,V) points of RTC photovoltaic cell and the current calculated using PSDA algorithm

| Measured data | | Current calculated | Error |
| --- | --- | --- | --- |
| V [V] | I [A] | Ie [A] | Rerr |
| -0.2057 | 0.7640 | 0.764018 | -0.000018 |
| -0.1291 | 0.7620 | 0.761398 | 0.000602 |
| -0.0588 | 0.7605 | 0.759664 | 0.000836 |
| 0.0057 | 0.7605 | 0.760828 | -0.000328 |
| 0.0646 | 0.7600 | 0.760894 | -0.000894 |
| 0.1185 | 0.7590 | 0.759880 | -0.00088 |
| 0.1678 | 0.7570 | 0.756813 | 0.000187 |
| 0.2132 | 0.7570 | 0.757758 | -0.000758 |
| 0.2545 | 0.7555 | 0.755824 | -0.000324 |
| 0.2924 | 0.7540 | 0.754279 | -0.000279 |
| 0.3269 | 0.7505 | 0.749602 | 0.000898 |
| 0.3585 | 0.7465 | 0.745698 | 0.000802 |
| 0.3873 | 0.7385 | 0.736988 | 0.001512 |
| 0.4137 | 0.7280 | 0.728751 | -0.000751 |
| 0.4373 | 0.7065 | 0.706146 | 0.000354 |
| 0.4590 | 0.6755 | 0.675785 | -0.000285 |
| 0.4784 | 0.6320 | 0.633235 | -0.001235 |
| 0.4960 | 0.5730 | 0.574001 | -0.001001 |
| 0.5119 | 0.4990 | 0.498291 | 0.000709 |
| 0.5265 | 0.4130 | 0.412266 | 0.000734 |
| 0.5398 | 0.3165 | 0.315455 | 0.001045 |
| 0.5521 | 0.2120 | 0.211880 | 0.00012 |
| 0.5633 | 0.1035 | 0.104840 | -0.00134 |
| 0.5736 | -0.0100 | -0.011206 | 0.001206 |
| 0.5833 | -0.1230 | -0.120456 | -0.002544 |
| 0.5900 | -0.2100 | -0.211630 | 0.00163 |

Table 7. (I,V) points of PWP201 photovoltaic panel and the current calculated using PSDA algorithm

| Measured data | | Current calculated | Error |
| --- | --- | --- | --- |
| V [V] | I [A] | Ie [A] | Rerr |
| -1.9426 | 1.0345 | 1.035542 | -0.001042 |
| 0.1248 | 1.0315 | 1.032408 | -0.000908 |
| 1.8093 | 1.0300 | 1.031760 | -0.00176 |
| 3.3511 | 1.0260 | 1.025951 | 0.000049 |
| 4.7622 | 1.0220 | 1.020070 | 0.00193 |
| 6.0538 | 1.0180 | 1.014290 | 0.00371 |
| 7.2364 | 1.0155 | 1.011952 | 0.003548 |
| 8.3189 | 1.0140 | 1.012680 | 0.00132 |
| 9.3097 | 1.0100 | 1.010531 | -0.000531 |
| 10.2163 | 1.0035 | 1.007179 | -0.003679 |
| 11.0449 | 0.9880 | 0.991845 | -0.003845 |
| 11.8018 | 0.9630 | 0.966324 | -0.003324 |
| 12.4929 | 0.9255 | 0.927438 | -0.001938 |
| 13.1231 | 0.8725 | 0.871224 | 0.001276 |
| 13.6983 | 0.8075 | 0.806346 | 0.001154 |
| 14.2221 | 0.7265 | 0.723362 | 0.003138 |
| 14.6995 | 0.6345 | 0.630910 | 0.00359 |
| 15.1346 | 0.5345 | 0.532374 | 0.002126 |
| 15.5311 | 0.4275 | 0.425644 | 0.001856 |
| 15.8929 | 0.3185 | 0.318907 | -0.000407 |
| 16.2229 | 0.2085 | 0.210640 | -0.00214 |
| 16.5241 | 0.1010 | 0.107030 | -0.00603 |
| 16.7987 | -0.0080 | -0.006774 | -0.001226 |
| 17.0499 | -0.1110 | -0.110640 | -0.00036 |
| 17.2793 | -0.2090 | -0.209047 | 0.000047 |
| 17.4885 | -0.3030 | -0.306450 | 0.00345 |

Table 8. (I.V) points of Kyocera KC200GT photovoltaic panel and the current calculated using PSDA algorithm

| Measured data | | Current calculated | Error |
| --- | --- | --- | --- |
| V [V] | I [A] | Ie [A] | Rerr |
| 0.0409 | 8.1761 | 8.177519337 | -0.00141934 |
| 1.0472 | 8.1761 | 8.168424463 | 0.00767554 |
| 2.0534 | 8.1761 | 8.159330491 | 0.0167695 |
| 3.0707 | 8.1364 | 8.150238977 | -0.013839 |
| 4.0769 | 8.1364 | 8.141144995 | -0.00474499 |
| 4.9082 | 8.1364 | 8.13363174 | 0.00276826 |
| 6.0129 | 8.1178 | 8.123695637 | -0.00589564 |
| 7.0192 | 8.1178 | 8.114600665 | 0.00319933 |
| 8.0255 | 8.1178 | 8.105505594 | 0.0122944 |
| 9.0427 | 8.0781 | 8.096414591 | -0.0183146 |
| 10.049 | 8.0781 | 8.087318911 | -0.00921891 |
| 11.0662 | 8.0781 | 8.078123862 | -2.39E-05 |
| 11.974 | 8.0781 | 8.069916304 | 0.0081837 |
| 12.9912 | 8.0595 | 8.060764585 | -0.00126458 |
| 13.9975 | 8.0595 | 8.051656394 | 0.00784361 |
| 15.0147 | 8.0385 | 8.042489602 | -0.0039896 |
| 16.021 | 8.0385 | 8.033337097 | 0.0051629 |
| 17.0272 | 8.0199 | 8.02417163 | -0.00427163 |
| 18.0445 | 8.0199 | 8.01472099 | 0.00517901 |
| 19.0507 | 8.0012 | 8.005142253 | -0.00394225 |
| 20.0679 | 7.9802 | 7.994860764 | -0.0146608 |
| 21.0742 | 7.9802 | 7.983341891 | -0.00314189 |
| 22.0805 | 7.9616 | 7.969155741 | -0.00755574 |
| 22.9993 | 7.9219 | 7.951395922 | -0.0294959 |
| 24.0165 | 7.9219 | 7.919815063 | 0.00208494 |
| 25.0227 | 7.8823 | 7.863689777 | 0.0186102 |
| 26.029 | 7.7844 | 7.756281158 | 0.0281188 |
| 27.0462 | 7.5699 | 7.545510638 | 0.0243894 |
| 28.0525 | 7.1385 | 7.159977439 | -0.0214774 |
| 29.0697 | 6.4717 | 6.471053888 | 0.000646112 |
| 30.076 | 5.4155 | 5.421286603 | -0.0057866 |
| 31.1807 | 3.8091 | 3.808682641 | 0.000417359 |
| 32.0995 | 2.1443 | 2.135949856 | 0.00835014 |
| 32.9198 | 0.44 | 0.443771095 | -0.00377109 |

Table 9. (I.V) points of LSM 20 photovoltaic panel and the current calculated using PSDA algorithm

| Measured data | | Current calculated | Error |
| --- | --- | --- | --- |
| V [V] | I [A] | Ie [A] | Rerr |
| 0 | 0.154 | 0.153664024 | 0.000335976 |
| 0.37 | 0.154 | 0.153559669 | 0.000440331 |
| 0.67 | 0.154 | 0.153475049 | 0.000524951 |
| 0.99 | 0.154 | 0.153384772 | 0.000615228 |
| 1.31 | 0.153 | 0.153296215 | -0.000296215 |
| 1.67 | 0.153 | 0.153194583 | -0.000194583 |
| 3.1 | 0.152 | 0.152791093 | -0.000791092 |
| 4.6 | 0.152 | 0.152350026 | -0.000350026 |
| 6 | 0.151 | 0.15182096 | -0.00082096 |
| 7.45 | 0.15 | 0.150277284 | -0.000277284 |
| 8.55 | 0.144 | 0.145147145 | -0.00114714 |
| 9.3 | 0.134 | 0.134314408 | -0.000314408 |
| 9.75 | 0.123 | 0.121651761 | 0.00134824 |
| 10.04 | 0.112 | 0.110332408 | 0.00166759 |
| 10.26 | 0.102 | 0.099715279 | 0.00228472 |
| 10.99 | 0.055 | 0.053391093 | 0.00160891 |
| 11.2 | 0.037 | 0.038208749 | -0.00120875 |
| 11.31 | 0.0281 | 0.028754923 | -0.000654923 |
| 11.37 | 0.0227 | 0.023895766 | -0.00119577 |
| 11.41 | 0.019 | 0.020667206 | -0.00166721 |
| 11.44 | 0.016 | 0.018461455 | -0.00246146 |
| 11.46 | 0.0142 | 0.016728181 | -0.00252818 |
| 11.48 | 0.0127 | 0.014603548 | -0.00190355 |
| 11.5 | 0.012 | 0.011441585 | 0.000558415 |
| 11.55 | 0.006 | 0.00877214 | -0.00277214 |
| 11.58 | 0.003 | 0.006365165 | -0.00336516 |
| 11.6 | 0.002 | 0.003412312 | -0.00141231 |
| 11.61 | 0.001 | 0.002584413 | -0.00158441 |
| 11.62 | 0.001 | 0.000399192 | 0.000600808 |
| 11.63 | 0.0006 | -0.001267672 | 0.00186767 |
| 11.632 | 0.0003 | -0.001300645 | 0.00160065 |
| 11.633 | 0.0002 | -0.001385864 | 0.00158586 |
| 11.636 | 0.0001 | -0.001917493 | 0.00201749 |
| 11.64 | 0.0001 | -0.002814142 | 0.00291414 |
| 11.65 | 0 | -0.004938072 | 0.00493807 |

Table 10. (I.V) points of STE 4/100 photovoltaic panel and the current calculated using PSDA algorithm

| Measured data | | Current calculated | Error |
| --- | --- | --- | --- |
| V [V] | I [A] | Ie [A] | Rerr |
| 0.00 | 0.0264 | 0.026419736 | -1.97E-05 |
| 0.10 | 0.0264 | 0.026372319 | 2.77E-05 |
| 0.30 | 0.0263 | 0.026277506 | 2.25E-05 |
| 0.50 | 0.0262 | 0.026182522 | 1.75E-05 |
| 0.70 | 0.0261 | 0.026086744 | 1.33E-05 |
| 0.90 | 0.026 | 0.025987298 | 1.27E-05 |
| 1.00 | 0.0259 | 0.025933056 | -3.31E-05 |
| 1.10 | 0.0258 | 0.025870827 | -7.08E-05 |
| 1.20 | 0.0257 | 0.025791272 | -9.13E-05 |
| 1.30 | 0.0256 | 0.025674029 | -7.40E-05 |
| 1.40 | 0.0253 | 0.025475159 | -0.000175159 |
| 1.50 | 0.0252 | 0.025096093 | 0.000103907 |
| 1.60 | 0.0247 | 0.024326669 | 0.000373331 |
| 1.70 | 0.0232 | 0.022722991 | 0.000477009 |
| 1.80 | 0.0189 | 0.019442624 | -0.000542624 |
| 1.90 | 0.0121 | 0.012794207 | -0.000694207 |
| 1.95 | 0.0081 | 0.007226841 | 0.000873159 |
| 2.00 | 0 | 0.000219779 | -0.000219779 |
